# Supplementary material for: The Association of Low-Penetrance Variants in DNA Repair Genes with Colorectal Cancer: A Systematic Review and Meta-Analysis
Source: PubMed Central journal article supplement — Clin Transl Gastroenterol. 2017 Jul 27;8(7):e109–. doi: 10.1038/ctg.2017.35 (PMC5539343; doi:10.1038/ctg.2017.35), 2017-07-27
Supplement: ctg201735x1.pdf [file ctg201735x1.pdf]

## SUPPLEMENTARY MATERIAL

| Polymorphisms and studies for which meta-analyses were conducted. |        |           |           |                            |                         |                                |
|-------------------------------------------------------------------|--------|-----------|-----------|----------------------------|-------------------------|--------------------------------|
| Pathway                                                           | Gene   | rs Number | Wt Allele | Odds Ratio                 | 95% CI                  | Reference                      |
| BER                                                               | APE1   | rs1130409 | G         | 1.52                       | 1.12-1.93               | Zhang et al <sup>1</sup>       |
|                                                                   |        |           |           | 1.07                       | 0.92-1.24               | Lai et al <sup>2</sup>         |
|                                                                   |        |           |           | 1.06                       | 0.89-1.26               | Li et al <sup>3</sup>          |
|                                                                   |        |           |           | 1.17                       | 0.98-1.36               | Pardini et al <sup>4</sup>     |
|                                                                   |        |           |           | 1.18                       | 0.95-1.47               | Moreno et al <sup>5</sup>      |
|                                                                   | MUTY H | rs3219489 | G         | 0.97                       | 0.84-1.12               | Tao et al <sup>6</sup>         |
|                                                                   |        |           |           | 0.97                       | 0.82-1.16               | Picelli et al <sup>7</sup>     |
|                                                                   |        |           |           | 1.67                       | 1.23-2.25               | Przybyowska et al <sup>8</sup> |
|                                                                   | OGG1   | rs1052133 | C         | 1.09                       | 0.98-1.22               | Curtin et al <sup>9</sup>      |
|                                                                   |        |           |           | 1.52                       | 0.94-2.46               | Sliwinski et al <sup>10</sup>  |
|                                                                   |        |           |           | 1.16                       | 0.90-1.49               | Brevik et al <sup>11</sup>     |
|                                                                   |        |           |           | 0.97                       | 0.66-1.42               | Engin et al <sup>12</sup>      |
|                                                                   |        |           |           | 0.83                       | 0.57-1.20               | Sameer et al <sup>13</sup>     |
|                                                                   |        |           |           | 1.47                       | 1.01-2.14               | Przybyowska et al <sup>8</sup> |
|                                                                   |        |           |           | 0.78                       | 0.57-1.05               | Hansen et al <sup>14</sup>     |
|                                                                   |        |           |           | 0.82                       | 0.63-1.07               | Moreno et al <sup>5</sup>      |
|                                                                   |        |           |           | 1.02                       | 0.83-1.25               | Pardini et al <sup>4</sup>     |
|                                                                   |        |           |           | 1.10                       | 0.92-1.33               | Stern et al <sup>15</sup>      |
|                                                                   |        |           |           | 1.04                       | 0.89-1.20               | Lai et al <sup>2</sup>         |
|                                                                   |        |           |           | 0.95                       | 0.75-1.22               | Zhang et al <sup>1</sup>       |
|                                                                   |        |           |           | 1.15                       | 0.71-1.88               | Gil et al <sup>16</sup>        |
|                                                                   | PARP 1 | rs1136410 | T         | 1.28                       | 1.07-1.52               | Li et al <sup>3</sup>          |
|                                                                   |        |           |           | 1.11                       | 0.84-1.45               | Brevik et al <sup>11</sup>     |
|                                                                   |        |           |           | 1.08                       | 0.90-1.29               | Stern et al <sup>15</sup>      |
|                                                                   | XRCC 1 | rs1799782 | C         | 2.52                       | 1.49-4.26               | Nissar et al                   |
|                                                                   |        |           |           | 1.30                       | 1.04-1.64               | Dai et al <sup>17</sup>        |
|                                                                   |        |           |           | 1.29                       | 1.07-1.55               | Li et al <sup>3</sup>          |
|                                                                   |        |           |           | 0.99                       | 0.85-1.16               | Yin et al <sup>18</sup>        |
|                                                                   |        |           |           | 0.56                       | 0.26-1.21               | Gsur et al <sup>19</sup>       |
|                                                                   |        |           |           | 1.11                       | 0.46-2.67               | Sliwinski et al <sup>10</sup>  |
|                                                                   |        |           |           | 4.04                       | 2.35-6.95               | Skjelbred et al <sup>20</sup>  |
|                                                                   |        |           |           | 0.81                       | 0.37-1.80               | Przybyowska et al <sup>8</sup> |
|                                                                   |        |           |           | 1.76                       | 0.71-4.37               | Gil et al <sup>16</sup>        |
|                                                                   |        |           |           | 0.84                       | 0.55-1.28               | Moreno et al <sup>5</sup>      |
|                                                                   |        | 1.23      | 0.88-1.71 | Pardini et al <sup>4</sup> |                         |                                |
|                                                                   |        | rs25487   | G         | 0.90                       | 0.70-1.17               | Zhang et al <sup>1</sup>       |
|                                                                   |        |           |           | 2.37                       | 1.69-3.31               | Procopciuc et al <sup>21</sup> |
|                                                                   |        |           |           | 0.99                       | 0.82-1.19               | Li et al <sup>3</sup>          |
|                                                                   |        |           |           | 1.19                       | 1.01-1.41               | Yin et al <sup>18</sup>        |
|                                                                   |        |           |           | 0.86                       | 0.62-1.17               | Gsur et al <sup>19</sup>       |
|                                                                   | 0.93   |           |           | 0.63-1.35                  | Gil et al <sup>16</sup> |                                |

|            |              |           |   |      |           |                                         |
|------------|--------------|-----------|---|------|-----------|-----------------------------------------|
|            |              |           |   | 0.84 | 0.56-1.26 | Sliwinski et al <sup>10</sup>           |
|            |              |           |   | 0.92 | 0.71-1.21 | Skjelbred et al <sup>20</sup>           |
|            |              |           |   | 0.89 | 0.76-1.05 | Yeh et al <sup>22</sup>                 |
|            |              |           |   | 1.43 | 1.04-1.95 | Przybyowska et al <sup>8</sup>          |
|            |              |           |   | 0.96 | 0.77-1.21 | Moreno et al <sup>5</sup>               |
|            |              |           |   | 0.94 | 0.79-1.12 | Pardini et al <sup>4</sup>              |
|            |              |           |   | 1.60 | 1.20-2.12 | Poomphakwaen et al <sup>23</sup>        |
|            |              | rs25489   | G | 1.03 | 0.67-1.60 | Moreno et al <sup>5</sup>               |
|            |              |           |   | 1.71 | 0.82-3.62 | Skjelbred et al <sup>20</sup>           |
|            |              |           |   | 0.96 | 0.75-1.24 | Yin et al <sup>18</sup>                 |
| <b>HRR</b> | <i>RAD18</i> | rs373572  | A | 1.45 | 1.02-2.05 | Kanzakhi et al <sup>24</sup>            |
|            |              |           |   | 1.28 | 1.07-1.52 | Pan et al <sup>125</sup>                |
|            |              |           |   | 1.32 | 1.09-1.61 | Pan et al <sup>25</sup>                 |
|            | <i>RAD51</i> | rs1801320 | G | 1.35 | 0.93-1.98 | Nissar et al <sup>26</sup>              |
|            |              |           |   | 1.02 | 0.70-1.47 | Romanowicz-Makowska et al <sup>27</sup> |
|            |              |           |   | 0.89 | 0.57-1.37 | Mucha et al <sup>28</sup>               |
|            |              |           |   | 0.31 | 0.20-0.48 | Krupa et al <sup>29</sup>               |
|            |              |           |   | 1.04 | 0.61-1.77 | Gil et al <sup>16</sup>                 |
|            | <i>XRCC3</i> | rs861539  | C | 2.14 | 1.38-3.31 | Nissar et al <sup>30</sup>              |
|            |              |           |   | 0.79 | 0.59-1.05 | Mucha et al <sup>31</sup>               |
|            |              |           |   | 1.13 | 0.76-1.68 | Gil et al <sup>16</sup>                 |
|            |              |           |   | 1.59 | 1.04-2.44 | Krupa et al <sup>29</sup>               |
|            |              |           |   | 0.84 | 0.64-1.09 | Skjelbred et al <sup>20</sup>           |
|            |              |           |   | 2.71 | 1.30-5.68 | Jin et al <sup>32</sup>                 |
|            |              |           |   | 0.80 | 0.57-1.13 | Yeh et al <sup>22</sup>                 |
|            |              |           |   | 0.91 | 0.73-1.13 | Moreno et al <sup>5</sup>               |
| <b>MMR</b> | <i>MLH1</i>  | rs1799977 | A | 1.09 | 0.98-1.20 | Picelli et al <sup>7</sup>              |
|            |              |           |   | 1.12 | 0.95-1.31 | Tulupova et al <sup>33</sup>            |
|            |              |           |   | 1.00 | 0.91-1.11 | Campbell et al <sup>34</sup>            |
|            |              |           |   | 1.80 | 1.26-2.58 | Nejda et al <sup>35</sup>               |
|            | <i>MSH2</i>  | rs2303425 | T | 1.05 | 0.82-1.25 | Li et al <sup>36</sup>                  |
|            |              |           |   | 1.01 | 0.85-1.21 | Mrkonjic et al <sup>137</sup>           |
|            |              |           |   | 1.13 | 0.92-1.38 | Mrkonjic et al <sup>237</sup>           |
|            | <i>MSH6</i>  | rs1042821 | C | 0.78 | 0.64-0.97 | Tulupova et al <sup>33</sup>            |
|            |              |           |   | 1.03 | 0.89-1.18 | Picelli et al <sup>7</sup>              |
|            |              |           |   | 1.12 | 0.99-1.26 | Campbell et al <sup>34</sup>            |
| <b>NER</b> | <i>ERCC1</i> | rs11615   | C | 1.24 | 0.97-1.58 | Skjelbred et al <sup>38</sup>           |
|            |              |           |   | 1.23 | 0.93-1.63 | Hou et al <sup>39</sup>                 |
|            |              |           |   | 0.96 | 0.66-1.40 | Gil et al <sup>16</sup>                 |
|            |              |           |   | 1.07 | 0.85-1.34 | Moreno et al <sup>5</sup>               |
|            | <i>ERCC5</i> | rs17655   | C | 1.05 | 0.92-1.20 | Sun et al <sup>40</sup>                 |
|            |              |           |   | 1.20 | 1.05-1.37 | Du et al <sup>41</sup>                  |
|            |              |           |   | 1.13 | 1.00-1.28 | Liu et al <sup>42</sup>                 |
|            |              |           |   | 1.53 | 0.98-2.40 | Gil et al <sup>16</sup>                 |
|            |              |           |   | 1.13 | 0.91-1.34 | Pardini et al <sup>4</sup>              |
|            | <i>TP53</i>  | rs1042522 | C | 1.08 | 0.91-1.27 | Steck et al <sup>43</sup>               |
|            |              |           |   | 1.10 | 0.60-2.03 | Abderrah et al <sup>44</sup>            |

|     |      |           |           |           |           |                                 |                               |                           |                                |
|-----|------|-----------|-----------|-----------|-----------|---------------------------------|-------------------------------|---------------------------|--------------------------------|
|     |      |           |           | 1.20      | 0.99-1.47 | Gao et al <sup>45</sup>         |                               |                           |                                |
|     |      |           |           | 0.84      | 0.79-1.01 | Oh et al <sup>46</sup>          |                               |                           |                                |
|     |      |           |           | 1.28      | 0.97-1.70 | Aizat et al <sup>47</sup>       |                               |                           |                                |
|     |      |           |           | 0.84      | 0.68-1.05 | Tan et al <sup>48</sup>         |                               |                           |                                |
|     |      |           |           | 1.10      | 0.92-1.32 | Koushik et al <sup>49</sup>     |                               |                           |                                |
|     |      |           |           | 1.19      | 0.92-1.53 | Gemignani et al <sup>50</sup>   |                               |                           |                                |
|     |      |           |           | 1.54      | 1.28-1.85 | Zhu et al <sup>51</sup>         |                               |                           |                                |
|     |      |           |           | 1.32      | 1.0-1.75  | Cao et al <sup>52</sup>         |                               |                           |                                |
|     |      |           |           | 1.04      | 0.87-1.24 | Polakova et al <sup>53</sup>    |                               |                           |                                |
|     |      |           |           | 0.78      | 0.61-1.01 | Dasterjedi et al <sup>54</sup>  |                               |                           |                                |
|     |      |           |           | 2.94      | 2.27-3.81 | Djansugrova et al <sup>55</sup> |                               |                           |                                |
|     | XPC  | rs2228000 | C         | 1.29      | 1.13-1.48 | Sun et al <sup>40</sup>         |                               |                           |                                |
|     |      |           |           |           |           | 0.90                            | 0.76-1.01                     | Wu et al <sup>56</sup>    |                                |
|     |      |           |           |           |           | 1.02                            | 0.84-1.23                     | Steck et al <sup>43</sup> |                                |
|     |      |           | rs2228001 | A         | 0.74      | 0.51-1.07                       | Engin et al <sup>12</sup>     |                           |                                |
|     |      |           |           |           |           |                                 | 1.07                          | 0.90-1.23                 | Hansen et al <sup>57</sup>     |
|     |      |           |           |           |           |                                 | 1.15                          | 0.78-1.69                 | Gil et al <sup>16</sup>        |
|     |      |           |           |           |           |                                 | 1.20                          | 1.01-1.42                 | Wu et al <sup>56</sup>         |
|     |      |           |           |           |           |                                 | 1.10                          | 0.97-1.25                 | Liu et al <sup>42</sup>        |
|     |      |           |           |           |           |                                 | 1.38                          | 1.06-1.79                 | Aizat et al <sup>58</sup>      |
|     |      |           |           | 1.04      | 0.88-1.24 | Pardini et al <sup>4</sup>      |                               |                           |                                |
|     | XPD  | rs13181   | G         | 0.96      | 0.61-1.52 | Gomez-Diaz et al <sup>59</sup>  |                               |                           |                                |
|     |      |           |           |           |           |                                 | 1.91                          | 1.32-2.74                 | Procopciuc et al <sup>21</sup> |
|     |      |           |           |           |           |                                 | 2.72                          | 2.07-3.56                 | Kabzinski et al <sup>60</sup>  |
|     |      |           |           |           |           |                                 | 1.23                          | 0.85-1.79                 | Gil et al <sup>16</sup>        |
|     |      |           |           |           |           |                                 | 0.63                          | 0.41-0.96                 | Sliwinski et al <sup>10</sup>  |
|     |      |           |           |           |           |                                 | 1.20                          | 0.91-1.57                 | Skjelbred et al <sup>20</sup>  |
|     |      |           |           |           |           |                                 | 1.17                          | 0.89-1.54                 | Yeh et al <sup>61</sup>        |
|     |      |           |           |           |           |                                 | 1.00                          | 0.84-1.200                | Hansen et al <sup>57</sup>     |
|     |      |           |           |           |           |                                 | 1.00                          | 0.80-1.25                 | Moreno et al <sup>5</sup>      |
|     |      |           |           |           |           |                                 | 1.11                          | 0.78-1.57                 | Jelonek et al <sup>62</sup>    |
|     |      |           | rs1799793 | G         | 1.46      | 1.10-1.93                       | Kabzinski et al <sup>60</sup> |                           |                                |
|     |      |           |           | 0.99      | 0.70-1.45 | Gil et al <sup>16</sup>         |                               |                           |                                |
|     |      |           |           | 0.99      | 0.83-1.89 | Hansen et al <sup>57</sup>      |                               |                           |                                |
| DRR | MGMT | rs12917   | C         | 0.74      | 0.53-1.05 | Stern et al <sup>15</sup>       |                               |                           |                                |
|     |      |           |           |           |           |                                 | 0.80                          | 0.60-1.01                 | Khatami et al <sup>63</sup>    |
|     |      |           |           |           |           |                                 | 0.91                          | 0.65-1.27                 | Moreno et al <sup>5</sup>      |
|     |      |           |           | rs2308321 | A         | 1.08                            | 0.83-1.42                     | Loh et al <sup>64</sup>   |                                |
|     |      |           |           |           |           |                                 |                               | 0.88                      | 0.60-1.30                      |
|     |      |           |           | 0.93      | 0.65-1.32 | Moreno et al <sup>5</sup>       |                               |                           |                                |

**Supplementary Table 1. Polymorphisms and studies for which meta-analyses were conducted.**

**Polymorphisms for which meta-analyses could not be conducted.**

| Pathway | Gene  | rs Number  | Wt Allele  | Odds Ratio | 95% CI                    | Reference                     |                            |
|---------|-------|------------|------------|------------|---------------------------|-------------------------------|----------------------------|
| BER     | APE1  | rs1760944  | C          | 0.97       | 0.84-1.12                 | Lai et al <sup>2</sup>        |                            |
|         |       |            |            | 0.85       | 0.67-1.08                 | Zhang et al <sup>1</sup>      |                            |
|         |       | rs2307486  | A          | 1.21       | 0.88-1.66                 | Kabzinski et al <sup>65</sup> |                            |
|         | MUTYH | rs3219484  | G          | 0.91       | 0.76-1.09                 | Picelli et al <sup>7</sup>    |                            |
|         | POLB  | rs3136797  | C          | 0.23       | 0.04-1.09                 | Moreno et al <sup>5</sup>     |                            |
|         | WRN   | rs1346044  | T          | 0.84       | 0.69-1.02                 | Sun et al <sup>40</sup>       |                            |
| 0.99    |       |            |            | 0.93-1.15  | Frank et al <sup>66</sup> |                               |                            |
| HRR     | NBS1  | rs2735383  | C          | 1.29       | 1.12-1.48                 | Li et al <sup>67</sup>        |                            |
|         |       |            |            | 1.26       | 1.01-1.56                 |                               |                            |
|         |       |            | rs1805794  | G          | 1.07                      | 0.93-1.23                     | Li et al <sup>67</sup>     |
|         |       |            | rs13312840 | T          | 1.07                      | 0.89-1.29                     | Li et al <sup>67</sup>     |
|         |       |            | rs1805794  | G          | 0.90                      | 0.75-1.08                     | Pardini et al <sup>4</sup> |
|         | 1.07  | 0.73-1.57  |            |            | Gil et al <sup>16</sup>   |                               |                            |
|         | RAD51 | rs2619679  | A          | 0.90       | 0.62-1.3                  | Mucha et al <sup>68</sup>     |                            |
|         |       | rs5030789  | G          | 1.27       | 0.88-1.87                 | Mucha et al <sup>68</sup>     |                            |
|         | XRCC2 | rs718282   | C          | 1.49       | 1.07-2.07                 | Li et al <sup>69</sup>        |                            |
|         |       | rs3218384  | G          | 1.23       | 0.88-1.72                 | Li et al <sup>69</sup>        |                            |
|         |       | rs3218536  | G          | 1.93       | 1.04-3.56                 | Krupa et al <sup>29</sup>     |                            |
| NHEJ    | XRCC4 | rs6869366  | T          | 0.47       | 0.33-0.69                 | Bau et al <sup>70</sup>       |                            |
|         |       | rs28360071 | Deletion   | 1.19       | 0.92-1.54                 | Bau et al <sup>70</sup>       |                            |
|         |       | rs7727691  | C          | 0.91       | 0.64-1.30                 | Bau et al <sup>70</sup>       |                            |
|         |       | rs2075685  | T          | 1.07       | 0.85-1.35                 | Bau et al <sup>70</sup>       |                            |
|         |       | rs2075686  | C          | 1.11       | 0.88-1.41                 | Bau et al <sup>70</sup>       |                            |
|         |       | rs3734091  | C          | 0.82       | 0.58-1.17                 | Bau et al <sup>70</sup>       |                            |
|         |       | rs28360317 | Deletion   | 1.12       | 0.90-1.40                 | Bau et al <sup>70</sup>       |                            |
| MMR     | MLH1  | rs1800734  | G          | 0.98       | 0.88-1.10                 | Campbell et al <sup>34</sup>  |                            |
|         |       |            |            | 0.99       | 0.82-1.20                 | Tulupova et al <sup>33</sup>  |                            |
|         | MSH2  | IVS7-212   | T          | 1.05       | 0.87-1.25                 | Li et al <sup>36</sup>        |                            |
|         |       |            |            | 0.95       | 0.80-1.13                 | Li et al <sup>36</sup>        |                            |
|         |       | rs2303428  | T          | 1.04       | 0.86-1.25                 | Li et al <sup>36</sup>        |                            |
|         |       |            |            | 1.17       | 0.88-1.55                 | Tulupova et al <sup>33</sup>  |                            |
|         |       | IVS10+12   | G          | 1.00       | 0.84-1.20                 | Li et al <sup>36</sup>        |                            |
|         |       | IVS11+107  | A          | 0.97       | 0.81-1.15                 | Li et al <sup>36</sup>        |                            |
|         |       | IVS11+183  | A          | 0.91       | 0.76-1.08                 | Li et al <sup>36</sup>        |                            |
|         |       | IVS8+719   | T          | 1.11       | 0.92-1.33                 | Li et al <sup>36</sup>        |                            |
|         | MSH3  | rs1805355  | G          | 1.28       | 0.95-1.72                 | Tulupova et al <sup>33</sup>  |                            |
|         |       | rs26279    | G          | 0.97       | 0.81-1.16                 | Tulupova et al <sup>33</sup>  |                            |
|         | MSH6  | rs3136228  | G          | 1.14       | 0.97-1.35                 | Tulupova et al <sup>33</sup>  |                            |
|         |       | rs2072447  | G          | 1.14       | 0.96-1.36                 | Tulupova et al <sup>33</sup>  |                            |
|         |       | rs41540312 | C          | 0.88       | 0.72-1.08                 | Mrkonjic et al <sup>37</sup>  |                            |
| 1.24    |       |            |            | 0.91-1.68  |                           |                               |                            |
| NER     | ERCC1 | rs2336219  | A          | 1.30       | 1.08-1.57                 | Dai et al <sup>17</sup>       |                            |
|         |       | rs3212986  | T          | 1.37       | 1.03-1.83                 | Hou et al <sup>39</sup>       |                            |
|         | EXO1  | rs9350     | C          | 0.78       | 0.53-1.14                 | Yamamoto et al <sup>71</sup>  |                            |
|         | XPA   | rs1800975  | G          | 0.89       | 0.74-1.06                 | Hansen et al <sup>57</sup>    |                            |
| 0.72    |       |            |            | 0.50-1.05  | Gil et al <sup>16</sup>   |                               |                            |

|  |            |           |   |      |           |                          |
|--|------------|-----------|---|------|-----------|--------------------------|
|  | <i>XPF</i> | rs2276466 | C | 1.17 | 0.90-1.52 | Yang et al <sup>72</sup> |
|  |            |           |   | 1.14 | 0.83-1.57 | Hou et al <sup>39</sup>  |

**Supplementary Table 2. Polymorphisms for which meta-analyses could not be conducted.**

Polymorphisms which have been shown to increase risk of CRC are in bold.

1. Zhang S, Wang L, Li Z, et al. APE1 polymorphisms are associated with colorectal cancer susceptibility in chinese hans. *World J Gastroenterol*. 2014;20(26):8700-8708.
2. Lai C, Hsieh L, Tang R, et al. Association between polymorphisms of APE1 and OGG1 and risk of colorectal cancer in taiwan. *World Journal of Gastroenterology*. 2016;22(12):3372.
3. Li Y, Li S, Wu Z, et al. Polymorphisms in genes of APE1, PARP1, and XRCC1: Risk and prognosis of colorectal cancer in a northeast chinese population. *Medical Oncology*. 2013;30(2):1-7.
4. Pardini B, Naccarati A, Novotny J, et al. DNA repair genetic polymorphisms and risk of colorectal cancer in the czech republic. *Mutation Research/Fundamental and Molecular Mechanisms of Mutagenesis*. 2008;638(1):146-153.
5. Moreno V, Gemignani F, Landi S, et al. Polymorphisms in genes of nucleotide and base excision repair: Risk and prognosis of colorectal cancer. *Clin Cancer Res*. 2006;12(7 Pt 1):2101-2108.

6. Tao H, Shinmura K, Suzuki M, et al. Association between genetic polymorphisms of the base excision repair gene MUTYH and increased colorectal cancer risk in a Japanese population. *Cancer science*. 2008;99(2):355-360.
7. Picelli S, Zajac P, Zhou X, et al. Common variants in human CRC genes as low-risk alleles. *Eur J Cancer*. 2010;46(6):1041-1048.
8. Przybylowska K, Kabzinski J, Sygut A, et al. An association selected polymorphisms of XRCC1, OGG1 and MUTYH gene and the level of efficiency oxidative DNA damage repair with a risk of colorectal cancer. *Mutation Research/Fundamental and Molecular Mechanisms of Mutagenesis*. 2013;745:6-15.
9. Curtin K, Samowitz WS, Wolff RK, et al. Assessing tumor mutations to gain insight into base excision repair sequence polymorphisms and smoking in colon cancer. *Cancer Epidemiol Biomarkers Prev*. 2009;18(12):3384-3388.
10. Sliwinski T, Krupa R, Wisniewska-Jarosinska M, et al. Common polymorphisms in the XPD and hOGG1 genes are not associated with the risk of colorectal cancer in a Polish population. *Tohoku J Exp Med*. 2009;218(3):185-191.
11. Brevik A, Joshi AD, Corral R, et al. Polymorphisms in base excision repair genes as colorectal cancer risk factors and modifiers of the effect of diets high in red meat. *Cancer Epidemiol Biomarkers Prev*. 2010;19(12):3167-3173.

12. Engin AB, Karahalil B, Engin A, et al. Oxidative stress, helicobacter pylori, and OGG1 Ser326Cys, XPC Lys939Gln, and XPD Lys751Gln polymorphisms in a turkish population with colorectal carcinoma. *Genetic testing and molecular biomarkers*. 2010;14(4):559-564.
13. Sameer AS, Nissar S, Abdullah S, et al. DNA repair gene 8-oxoguanine DNA glycosylase Ser326Cys polymorphism and colorectal cancer risk in a kashmiri population. *DNA Cell Biol*. 2012;31(4):541-546.
14. Hansen R, Sæbø M, Skjelbred CF, et al. GPX Pro198Leu and OGG1 Ser326Cys polymorphisms and risk of development of colorectal adenomas and colorectal cancer. *Cancer Lett*. 2005;229(1):85-91.
15. Stern MC, Conti DV, Siegmund KD, et al. DNA repair single-nucleotide polymorphisms in colorectal cancer and their role as modifiers of the effect of cigarette smoking and alcohol in the singapore chinese health study. *Cancer Epidemiol Biomarkers Prev*. 2007;16(11):2363-2372.
16. Gil J, Ramsey D, Stembalska A, et al. The C/A polymorphism in intron 11 of the XPC gene plays a crucial role in the modulation of an individual's susceptibility to sporadic colorectal cancer. *Mol Biol Rep*. 2012;39(1):527-534.
17. Dai Q, Luo H, Li XP, et al. XRCC1 and ERCC1 polymorphisms are related to susceptibility and survival of colorectal cancer in the chinese population. *Mutagenesis*. 2015;30(3):441-449.

18. Yin G, Morita M, Ohnaka K, et al. Genetic polymorphisms of XRCC1, alcohol consumption, and the risk of colorectal cancer in japan. *Journal of Epidemiology*. 2012;22(1):64-71.
19. Gsur A, Bernhart K, Baierl A, et al. No association of XRCC1 polymorphisms Arg194Trp and Arg399Gln with colorectal cancer risk. *Cancer epidemiology*. 2011;35(5):e38-e41.
20. Skjelbred C, Sæbø M, Wallin H, et al. Polymorphisms of the XRCC1, XRCC3 and XPD genes and risk of colorectal adenoma and carcinoma, in a norwegian cohort: A case control study. *BMC Cancer*. 2006;6(1):1.
21. Procopciuc L, Osian G. Lys751Gln XPD and Arg399Gln XRCC1 in romanians. association with sporadic colorectal cancer risk and different stages of carcinomas. *Chirurgia (Bucur )*. 2013;108(5):711-718.
22. Yeh C, Hsieh L, Tang R, et al. MS-920: DNA repair gene polymorphisms, diet and colorectal cancer risk in taiwan. *Cancer Lett*. 2005;224(2):279-288.
23. Poomphakwaen K, Promthet S, Suwanrungruang K, et al. XRCC1 gene polymorphism, diet and risk of colorectal cancer in thailand. *Asian Pac J Cancer Prev*. 2014;15(17):7479-7486.
24. Kanzaki H, Ouchida M, Hanafusa H, et al. Single nucleotide polymorphism in the RAD18 gene and risk of colorectal cancer in the japanese population. *Oncol Rep*. 2007;18(5):1171-1175.



25. Pan J, Chi P, Lu X, et al. Genetic polymorphisms in translesion synthesis genes are associated with colorectal cancer risk and metastasis in han chinese. *Gene*. 2012;504(2):151-155.
26. Nissar S, Baba SM, Akhtar T, et al. RAD51 G135C gene polymorphism and risk of colorectal cancer in kashmir. *Eur J Cancer Prev*. 2014;23(4):264-268.
27. Romanowicz-Makowska H, Samulak D, Michalska M, et al. RAD51 gene polymorphisms and sporadic colorectal cancer risk in poland. *Pol J Pathol*. 2012;63(3):193-198.
28. Mucha B, Przybyłowska-Sygut K, Dziki Ł, et al. Lack of association between the 135G/C RAD51 gene polymorphism and the risk of colorectal cancer among polish population. *Polish Journal of Surgery*. 2012;84(7):358-362.
29. Krupa R, Sliwinski T, Wisniewska-Jarosinska M, et al. Polymorphisms in RAD51, XRCC2 and XRCC3 genes of the homologous recombination repair in colorectal cancer—a case control study. *Mol Biol Rep*. 2011;38(4):2849-2854.
30. Nissar S, Sameer AS, Lone TA, et al. XRCC3 Thr241Met gene polymorphism and risk of colorectal cancer in kashmir: A case control study. *Asian Pac J Cancer Prev*. 2014;15(22):9621-9625.

31. Mucha B, Przybylowska-Sygut K, Dziki AJ, et al. Association of Thr241Met polymorphism of XRCC3 gene with risk of colorectal cancer in the polish population. *Pol J Pathol*. 2013;64(3):185-190.
32. Jin M, Chen K, Song L, et al. The association of the DNA repair gene XRCC3 Thr241Met polymorphism with susceptibility to colorectal cancer in a chinese population. *Cancer Genet Cytogenet*. 2005;163(1):38-43.
33. Tulupova E, Kumar R, Hanova M, et al. Do polymorphisms and haplotypes of mismatch repair genes modulate risk of sporadic colorectal cancer? *Mutation Research/Fundamental and Molecular Mechanisms of Mutagenesis*. 2008;648(1):40-45.
34. Campbell PT, Curtin K, Ulrich CM, et al. Mismatch repair polymorphisms and risk of colon cancer, tumour microsatellite instability and interactions with lifestyle factors. *Gut*. 2009;58(5):661-667.
35. Nejda N, Iglesias D, Azcoita MM, et al. A MLH1 polymorphism that increases cancer risk is associated with better outcome in sporadic colorectal cancer. *Cancer Genet Cytogenet*. 2009;193(2):71-77.
36. Li G, Hu F, Yuan F, et al. Intronic and promoter polymorphisms of hMLH1/hMSH2 and colorectal cancer risk in heilongjiang province of china. *J Cancer Res Clin Oncol*. 2015;141(8):1393-1404.
37. Mrkonjic M, Raptis S, Green RC, et al. MSH2 118T>C and MSH6 159C>T promoter polymorphisms and the risk of colorectal cancer. *Carcinogenesis*. 2007;28(12):2575-2580.

38. Skjelbred CF, Saebo M, Nexo BA, et al. Effects of polymorphisms in ERCC1, ASE-1 and RAI on the risk of colorectal carcinomas and adenomas: A case control study. *BMC Cancer*. 2006;6:175.
39. Hou R, Liu Y, Feng Y, et al. Association of single nucleotide polymorphisms of ERCC1 and XPF with colorectal cancer risk and interaction with tobacco use. *Gene*. 2014;548(1):1-5.
40. Sun K, Gong A, Liang P. Predictive impact of genetic polymorphisms in DNA repair genes on susceptibility and therapeutic outcomes to colorectal cancer patients. *Tumor Biol*. 2015;36(3):1549-1559.
41. Du H, Zhang X, Du M, et al. Association study between XPG Asp1104His polymorphism and colorectal cancer risk in a chinese population. *Scientific reports*. 2014;4.
42. Liu D, Wu HZ, Zhang YN, et al. DNA repair genes XPC, XPG polymorphisms: Relation to the risk of colorectal carcinoma and therapeutic outcome with oxaliplatin-based adjuvant chemotherapy. *Mol Carcinog*. 2012;51 Suppl 1:E83-93.
43. Steck SE, Butler LM, Keku T, et al. Nucleotide excision repair gene polymorphisms, meat intake and colon cancer risk. *Mutat Res*. 2014;762:24-31.
44. Abderrahmane R, Louhibi L, Moghtit FZ, et al. TP53 arg 72Pro and MDM2 SNP309 polymorphisms and colorectal cancer risk: A west algerian population study. *Pathol Oncol Res*. 2015;21(3):629-635.

45. Gao LB, Li LJ, Pan XM, et al. A genetic variant in the promoter region of miR-34b/c is associated with a reduced risk of colorectal cancer. *Biol Chem.* 2013;394(3):415-420.
46. Oh J, Kim JW, Lee BE, et al. Polymorphisms of the pri-miR-34b/c promoter and TP53 codon 72 are associated with risk of colorectal cancer. *Oncol Rep.* 2014;31(2):995-1002.
47. Aizat AA, Shahpuhin SN, Mustapha MA, et al. Association of Arg72Pro of P53 polymorphism with colorectal cancer susceptibility risk in malaysian population. *Asian Pac J Cancer Prev.* 2011;12(11):2909-2913.
48. Tan XL, Nieters A, Hoffmeister M, et al. Genetic polymorphisms in TP53, nonsteroidal anti-inflammatory drugs and the risk of colorectal cancer: Evidence for gene-environment interaction? *Pharmacogenet Genomics.* 2007;17(8):639-645.
49. Koushik A, Tranah GJ, Ma J, et al. p53 Arg72Pro polymorphism and risk of colorectal adenoma and cancer. *Int J Cancer.* 2006;119(8):1863-1868.
50. Gemignani F, Moreno V, Landi S, et al. A TP53 polymorphism is associated with increased risk of colorectal cancer and with reduced levels of TP53 mRNA. *Oncogene.* 2004;23(10):1954-1956.
51. Zhu ZZ, Wang AZ, Jia HR, et al. Association of the TP53 codon 72 polymorphism with colorectal cancer in a chinese population. *Jpn J Clin Oncol.* 2007;37(5):385-390.

52. Cao Z, Song JH, Park YK, et al. The p53 codon 72 polymorphism and susceptibility to colorectal cancer in korean patients. *Neoplasma*. 2009;56(2):114-118.
53. Polakova V, Pardini B, Naccarati A, et al. Genotype and haplotype analysis of cell cycle genes in sporadic colorectal cancer in the czech republic. *Hum Mutat*. 2009;30(4):661-668.
54. Dastjerdi MN. TP53 codon 72 polymorphism and P53 protein expression in colorectal cancer specimens in isfahan. *Acta Med Iran*. 2011;49(2):71-77.
55. Djansugurova L, Zhunussova G, Khussainova E, et al. Association of DCC, MLH1, GSTT1, GSTM1, and TP53 gene polymorphisms with colorectal cancer in kazakhstan. *Tumour Biol*. 2015;36(1):279-289.
56. Wu Y, Jin M, Liu B, et al. The association of XPC polymorphisms and tea drinking with colorectal cancer risk in a chinese population. *Mol Carcinog*. 2011;50(3):189-198.
57. Hansen RD, Sørensen M, Tjønneland A, et al. XPA A23G, XPC Lys939Gln, XPD Lys751Gln and XPD Asp312Asn polymorphisms, interactions with smoking, alcohol and dietary factors, and risk of colorectal cancer. *Mutation Research/Fundamental and Molecular Mechanisms of Mutagenesis*. 2007;619(1):68-80.
58. Ahmad A, Abdul A. XPC Lys939Gln polymorphism, smoking and risk of sporadic colorectal cancer among malaysians. *World Journal of Gastroenterology*. 2013;19(23):3623-3628.

59. Gomez-Diaz B, DE LA Luz Ayala-Madrigal M, Gutierrez-Angulo M, et al. Analysis of ERCC1 and ERCC2 gene variants in osteosarcoma, colorectal and breast cancer. *Oncol Lett.* 2015;9(4):1657-1661.
60. Kabzinski J, Przybylowska K, Dziki L, et al. An association of selected ERCC2 and ERCC5 genes polymorphisms, the level of oxidative DNA damage and its repair efficiency with a risk of colorectal cancer in polish population. *Cancer Biomark.* 2015;15(4):413-423.
61. Yeh CC, Sung FC, Tang R, et al. Polymorphisms of the XRCC1, XRCC3, & XPD genes, and colorectal cancer risk: A case-control study in taiwan. *BMC Cancer.* 2005;5:12.
62. Jelonek K, Gdowicz-Klosok A, Pietrowska M, et al. Association between single-nucleotide polymorphisms of selected genes involved in the response to DNA damage and risk of colon, head and neck, and breast cancers in a polish population. *J Appl Genet.* 2010;51(3):343-352.
63. Khatami F, Noorinayer B, Mohebi SR, et al. Effects of amino acid substitution polymorphisms of two DNA methyltransferases on susceptibility to sporadic colorectal cancer. *Asian Pac J Cancer Prev.* 2009;10(6):1183-1188.
64. Loh YH, Mitrou PN, Bowman R, et al. MGMT Ile143Val polymorphism, dietary factors and the risk of breast, colorectal and prostate cancer in the european prospective investigation into cancer and nutrition (EPIC)-norfolk study. *DNA Repair (Amst).* 2010;9(4):421-428.

65. Kabziński J, Majsterek I, Mik M, et al. Impact of APEX Ile64val gene polymorphisms of DNA repair ber system on modulation of the risk of colorectal cancer in the polish population. *Polish Journal of Surgery*. 2015;87(3):121-123.
66. Frank B, Hoffmeister M, Klopp N, et al. Colorectal cancer and polymorphisms in DNA repair genes WRN, RMI1 and BLM. *Carcinogenesis*. 2010;31(3):442-445.
67. Li J, Zhong B, Xu H, et al. Associations between NBS1 polymorphisms and colorectal cancer in chinese population. *PloS one*. 2015;10(7):e0132332.
68. Mucha B, Kabzinski J, Dziki A, et al. Polymorphism within the distal RAD51 gene promoter is associated with colorectal cancer in a polish population. *International Journal of Clinical and Experimental Pathology*. 2015;8(9):11601.
69. Li X, Luo H, Huang J, et al. XRCC2 gene polymorphisms and its protein are associated with colorectal cancer susceptibility in chinese han population. *Medical Oncology*. 2014;31(11):1-6.
70. Bau DT, Yang MD, Tsou YA, et al. Colorectal cancer and genetic polymorphism of DNA double-strand break repair gene XRCC4 in taiwan. *Anticancer Res*. 2010;30(7):2727-2730.
71. Yamamoto H, Hanafusa H, Ouchida M, et al. Single nucleotide polymorphisms in the EXO1 gene and risk of colorectal cancer in a japanese population. *Carcinogenesis*. 2005;26(2):411-416.

72. Yang H, Li G, Li W. Association between ERCC1 and XPF polymorphisms and risk of colorectal cancer. *Genetics and Molecular Research*. 2015;14(1):700-705.
